# Supplementary material for: Family member-based supervision of patients with hypertension: a cluster randomized trial in rural China
Source: PubMed Central journal article supplement — J Hum Hypertens. 2016 Feb 25;31(1):29–36. doi: 10.1038/jhh.2016.8 (PMC5144121; doi:10.1038/jhh.2016.8), 2016-02-25
Supplement: jhh20168x1.pdf [file jhh20168x1.pdf]

## Education materials

# 控制高血压，享受健康生活

### 1. 什么是高血压？

在未使用降压药物情况下，收缩压大于140mmHg 和（或）舒张压大于90mmHg 即可诊断为高血压。但仅一次血压值升高不能确诊，须由专业人员在不同时间测量后方可确诊。

### 2. 高血压的危害

高血压的危害主要表现在对心、脑血管和肾脏等器官的损害，严重者可致残、致死。

### 3. 控制高血压应注意

(1) 按时测量血压，如发现服药后血压控制不理想，请至专业医疗机构调整用药方案。

(2) 坚持按医生指导规律服药，不可随意停用降压药，忌无症状、不难受就不服药。

(3) 请您每天将服药情况记录在我们发放给您的日历上，如测量血压也请将血压值记录在日历上。

(4) 戒烟、限酒、减少食盐摄入、合理膳食、控制超重与肥胖、保持适度身体活动。

**如果您或者您的家人是高血压病人，请按时服用抗高血压药，定期测量血压！**

\*如有疑问，请与扬中市疾病预防控制中心‘全医生’联系，电话 0511-88221425

扬中市疾病预防控制中心  
南京医科大学公共卫生学院

## 高血压与肥胖

均衡膳食，适当运动，心胸开朗  
戒烟限酒，生活规律，平衡降压

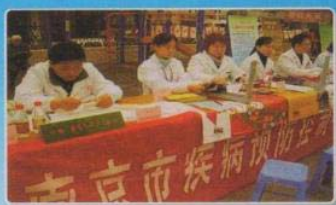

发展慢病社区健康服务，是党和政府  
对人民健康的关怀。

慢病的社会防治，降低患者昂贵的  
医疗费用，减轻沉重的社会负担。

社区的慢病防治需要社区居民的理  
解、支持和参与。

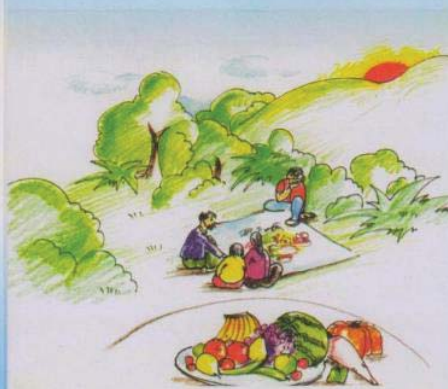

南京市慢病社区防治系列资料(3)

### 肥胖与高血压

肥胖高血压的一个主要危险因素。根据研究表明，体重每增加 12.5 公斤，血压可上升 10/7mmHg；肥胖人群高血压的患病率较体重正常人群增高 2-6 倍高血压病人中 60% 以上有超重和肥胖，并且在年轻患者更明显。体重增加是引起其它心血管病的主要危险因素，各种危险因素常合并存在；高血压病人中，肥胖者比体重正常者更容易患。

冠心病；肥胖是儿童高血压的重要危险因素。

#### 肥胖可通过 4 种方式影响血压：

- 1) 导致钠滞留；减少尿钠排出，增加肾小管对钠的重吸收，使血容量增加，心输出量增加，因而使血压升高
- 2) 肥胖者进食热量过多，过多的碳水化合物刺激交感神经系统，导致血压升高
- 3) 使血管平滑肌肥厚
- 4) 使血管平滑肌细胞内游离钙增加

#### 人为什么会肥胖？

人体摄入的热量超过机体所消耗的热量，过多的热量在体内转变为脂肪并大量蓄积起来就会引起肥胖。因此如果吃的多而又不运动就必然会变胖。

### 肥胖的标准

身高质量指数大于等于 25 为超重。大于 27 为肥胖。身高质量指数 (BMI) 的计算方法为：体重 (公斤) / 身高 (米)<sup>2</sup>

### 怎样控制体重

减轻体重的关键时控制热量的摄入和增加运动，因此在选择食物时要遵循以下原则：

- 1、避免高脂肪、高胆固醇食物：如肥肉、动物内脏、黄油等；注意看不到的脂肪：如瘦肉和牛奶。
- 2、避免过多摄入糖、饮料和甜点。
- 3、零食的热量，如每天多吃两把花生，一星期就会增加 650 克 (1.3 公斤) 的脂肪；多吃 2 两葵花子相当于多吃 4 两米饭或多吃 1 斤 2 两面条。
- 4、意快餐食品，汉堡包、薯条、奶昔、冰激凌都含有惊人的热量。
- 5、多吃高纤维食物，如水果、蔬菜及粗粮等。
- 6、改变烹调方法，多用蒸、炖、煮、拌，避免吃多油的煎炸食品。

10月8日  
全国高血压日

- ★ 尽早使用限盐工具。
- ★ 用其他调味品弥补限盐后的口感需求，如醋、植物调味品等。
- ★ 鲜鱼类可采用清蒸，可以减少放盐的量。
- ★ 做汤时尽量少放盐，或完全不放盐，用蘑菇、木耳、海带等提色提鲜就足够了。
- ★ 推迟放盐的时间也是个办法，待炒菜出锅时再放盐，这样盐分不会渗入菜中。

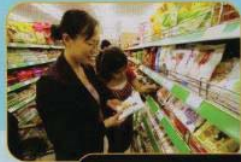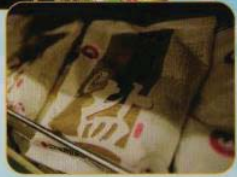

常见食物中含盐量速查表  
(下列数据是指每100g食物中的含盐量(g))

| 分类          | 食物名称  | 含盐量(g) | 分类     | 食物名称 | 含盐量(g) |
|-------------|-------|--------|--------|------|--------|
| 流<br>食<br>品 | 方便面   | 2.9    | 食      | 烤鸭   | 8.1    |
|             | 油条    | 1.5    |        | 鸡肉松  | 4.3    |
|             | 咸大饼   | 1.5    |        | 盐水鸭  | 4.0    |
|             | 麦酥面包  | 1.2    |        | 酱鸭   | 2.3    |
|             | 法式面包  | 1.2    |        | 扒鸡   | 2.5    |
|             | 牛奶饼干  | 1.0    |        | 北京烤鸭 | 2.1    |
|             | 苏打饼干  | 0.6    |        | 百律鸡  | 1.9    |
|             | 咖喱牛肉干 | 5.3    |        | 烤鸭   | 1.2    |
|             | 保健肉松  | 5.3    |        | 咸鸭蛋  | 6.9    |
|             | 咸肉    | 4.9    |        | 皮蛋   | 1.4    |
| 肉<br>类      | 福建肉松  | 3.6    | 菜      | 黄萝卜  | 17.5   |
|             | 火腿    | 2.9    |        | 芹菜   | 12.6   |
|             | 午餐肉   | 2.5    |        | 香蕨菜  | 11.8   |
|             | 酱牛肉   | 2.2    |        | 酱大头菜 | 11.7   |
|             | 叉烧肉   | 2.1    |        | 榨菜   | 10.6   |
|             | 广东香肠  | 2.0    |        | 什锦菜  | 10.4   |
|             | 火腿肠   | 2.0    |        | 萝卜干  | 10.2   |
|             | 生腊肉   | 1.9    |        | 酱黄瓜  | 9.6    |
|             | 小火腿   | 1.7    |        | 腌雪里红 | 8.4    |
|             | 红肠    | 1.3    |        | 乳黄瓜  | 7.8    |
| 鱼<br>类      | 宫爆肉丁  | 1.2    | 调<br>品 | 酱瓜   | 6.4    |
|             | 咸鱼    | 13.5   |        | 炒凉花籽 | 3.4    |
|             | 虾皮    | 12.8   |        | 小糖糕  | 1.1    |
|             | 虾米    | 12.4   |        | 花生米  | 1.1    |
|             | 鱼片干   | 8.9    |        | 辣味   | 0.6    |
|             | 鱼松片   | 1.6    |        | 味精   | 20.7   |
|             | 虾油    | 2.4    |        | 豆瓣酱  | 15.3   |
|             | 臭豆腐   | 5.1    |        | 酱油   | 14.6   |
|             | 五香豆   | 4.1    |        | 辣酱   | 8.2    |
|             | 素火腿   | 1.7    |        | 花生酱  | 5.9    |
| 乳<br>类      | 豆腐干   | 1.6    | 其<br>它 | 甜面酱  | 5.3    |
|             | 兰花豆   | 1.4    |        | 五香豆豉 | 4.1    |
|             | 熏鸡    | 1.0    |        | 辣肠   | 2.0    |
|             | 白乳腐   | 6.2    |        |      |        |

2009年世界高血压日  
2009年中国高血压日

## 盐与高血压 Salt and Hypertension

高盐与高血压  
最容易让人忽视的  
隐形“杀手”

江苏省卫生厅 江苏省疾病预防控制中心

10月8日  
全国高血压日

## 高盐与高血压 最容易让人忽视的“杀手”

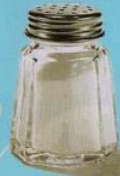

**前言：**2002年中国居民营养与健康状况调查资料显示，我国居民平均每人每日食盐的摄入量为12g，城市10.9g，农村12.4g。酱油平均为8.9g，城市10.6g，农村8.2g。虽然比1992年略有下降，但远高于6g食盐的建议量，引发慢性病的危险仍然存在。

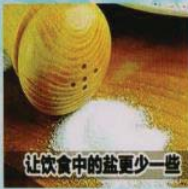

让饮食中的盐更少一些

### 高盐与高血压的危害

- ★ 高血压是全球脑卒中、心脏病和肾脏病死亡的最大独立危险因素。
- ★ 盐是升高血压的重要危险因素。
- ★ 减少盐的摄入量可降低人群血压水平。
- ★ 如盐摄入量减少一半，每年全球可减少脑卒中、心脏病和慢性肾脏病死亡250万人。
- ★ 高盐和高血压是两个“无声杀手”。

### 为什么盐摄入过多会引起血压升高呢？

简单地说，盐摄入多了，血管中的水分就会增加，使血管壁受到的压力增强，最终导致了血压的升高。

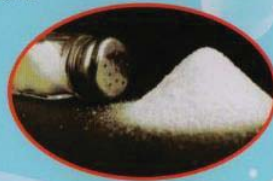

### 正常成人每天应该吃多少盐？

世界卫生组织推荐：每日每人摄入食盐<5g。中国高血压联盟根据我国的国情提出<6g/天。

### 如何衡量6克盐是多少呢？

- ☉ 一个普通啤酒瓶盖装盐，平装满一盖，即相当于5-6克食盐。
- ☉ 限量小盐勺：使用2克小盐勺控制盐量。
- ☉ 凡口味偏重者还可以采用在原来用盐量的基础上减少1/3-1/2的办法。
- ☉ 食用低钠盐。

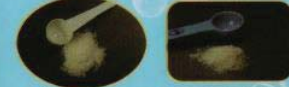

6克的盐勺和啤酒瓶盖

3克的盐勺和2克小盐勺

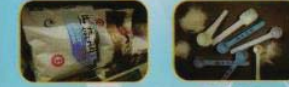

低钠盐

各种小盐勺

### 减少用盐的小窍门，避免摄入过多的盐

- ★ 少食腌制的食品，如酱、酱菜、咸肉、咸鱼、香肠、烧鸡、熏肉等。
- ★ 少食方便快餐食品：比如汉堡包、油炸土豆、方便面调料、罐头食品等。
- ★ 注意少用含钠调味品：酱油、番茄酱、蛋黄酱、沙拉酱等。

## Group sessions

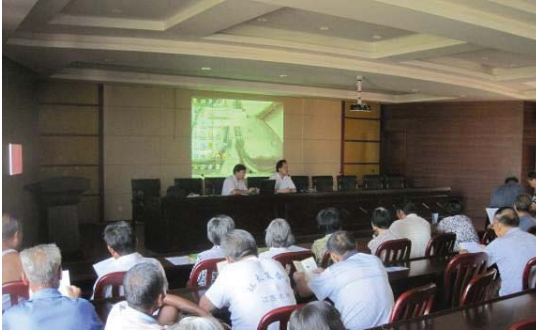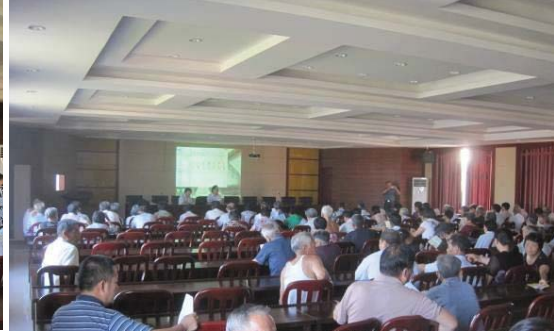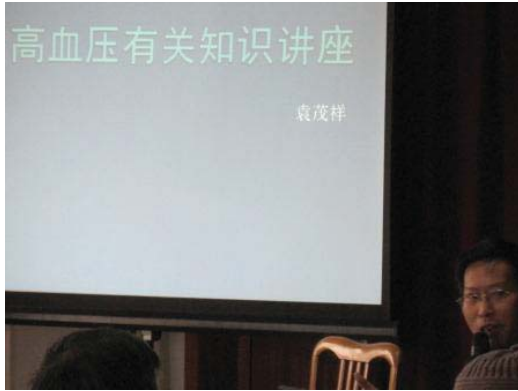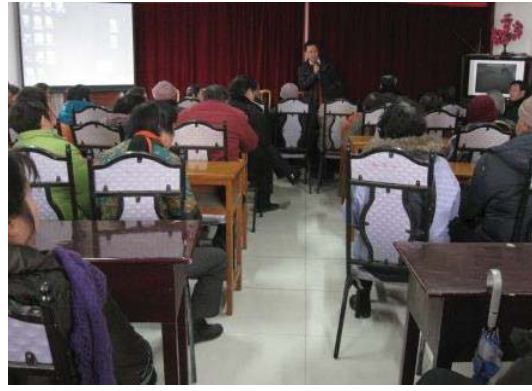

# Calendar

## 控制高血压,享受健康生活



Happy New Year

扬州疾病预防控制中心  
南京医科大学公共卫生学院  
CHINA MEDICAL BOARD  
美国中华医学基金会

---

### 06月 June 农历癸巳年 蛇年 控制高血压/享受健康生活

| 星期日 Sunday | 星期一 Monday | 星期二 Tuesday | 星期三 Wednesday | 星期四 Thursday | 星期五 Friday | 星期六 Saturday |
|------------|------------|-------------|---------------|--------------|------------|--------------|
|            |            |             |               |              |            | 01           |
| 02         | 03         | 04          | 05            | 06           | 07         | 08           |
| 09         | 10         | 11          | 12            | 13           | 14         | 15           |
| 16         | 17         | 18          | 19            | 20           | 21         | 22           |
| 23         | 24         | 25          | 26            | 27           | 28         | 29           |
| 30         |            |             |               |              |            |              |

备注: 请在服药的日子标注“V”; 请在中医服药的日子标注“X”; 请在测量血压的日子标注血压值

---

## 健康格言

在您每日不停地忙碌工作的时候,请您放慢脚步,认真地考虑一下自己的健康问题,送上几句健康格言,衷心希望您能保重身体,与家人共享美好人生!

- ♥ 健康是一种自由——在一切自由中首屈一指。 ——(瑞士)亚美路
- ♥ 不要用珍宝装饰自己,而要用健康武装身体。 ——欧洲谚语
- ♥ 有规律的生活原是健康与长寿的秘诀。 ——巴尔扎克
